# Supplementary material for: Monitoring of the Venezuelan exodus through Facebook’s advertising platform
Source: PubMed Central journal article supplement (PMC7034953; doi:10.1371/journal.pone.0229175), 2020-02-21
Supplement: pone.0229175.s001.pdf [file pone.0229175.s001.pdf]

# Supplementary Material: Monitoring of the Venezuelan exodus through Facebook’s advertising platform

Joao Palotti<sup>1,2</sup>, Natalia Adler<sup>3</sup>, Alfredo Morales-Guzman<sup>2</sup>, Jeffrey Villaveces<sup>4</sup>, Vedran Sekara<sup>3</sup>, Manuel Garcia Herranz<sup>3</sup>, Musa Al-Asad<sup>5</sup>, Ingmar Weber<sup>1\*</sup>

**1** Qatar Computing Research Institute, HBKU, Doha, Qatar

**2** Massachusetts Institute of Technology, Cambridge, United States

**3** UNICEF, New York, United States

**4** iMMAP Colombia, Bogotá, Colombia

**5** Global Protection Cluster, Geneva, Switzerland

\* Corresponding author: iweber@hbku.edu.qa (IW)

## Assessing the collection variability over time

Snapshots of this migration crisis, as shown in Figs 1-4, are useful for stakeholders as they provide an overview of the crisis in near real-time with high spatial resolution. Nevertheless, it is important to understand the stability of such a snapshot. For that, we calculated the average absolute relative percentage change for two consecutive data collections  $C_1$  and  $C_2$  as follows:

$$Variability = \frac{1}{|\text{Locations}|} \sum_l^{\text{Locations}} \frac{|C_{1l} - C_{2l}|}{\min(C_{1l}, C_{2l})}, \quad (1)$$

with  $C_{xl}$  representing the number of migrants or refugees from Venezuela living in location  $l$  at the time of collection  $x$  according to the Facebook Marketing API. Fig B shows the temporal variability of our data from May 2018 to February 2019. We also noticed a bi-weekly pattern, with the larger peaks at or close to the indicated vertical lines (every 14 days). Note that our collections were not always started at the same time of the day and sometimes exceeded 12 hours to run. Hence we believe that the actual alignment with these vertical lines is even higher, indicating a 2-week Facebook-internal refresh cycle, potentially together with smaller daily updates.

Although beyond this paper scope, Fig C shows a potential way to provide smoothed estimates avoiding sudden changes due to Facebook refresh updates. Additionally to using single-point estimates as done in Fig 3, in future work, we propose a running average that makes use of past estimates. In Fig C, we compare the single-point estimates to a running average over estimates collected in the prior 28 days. The biggest gap between these two estimates was found in late August 2018, the period in which fewer data collections were performed.

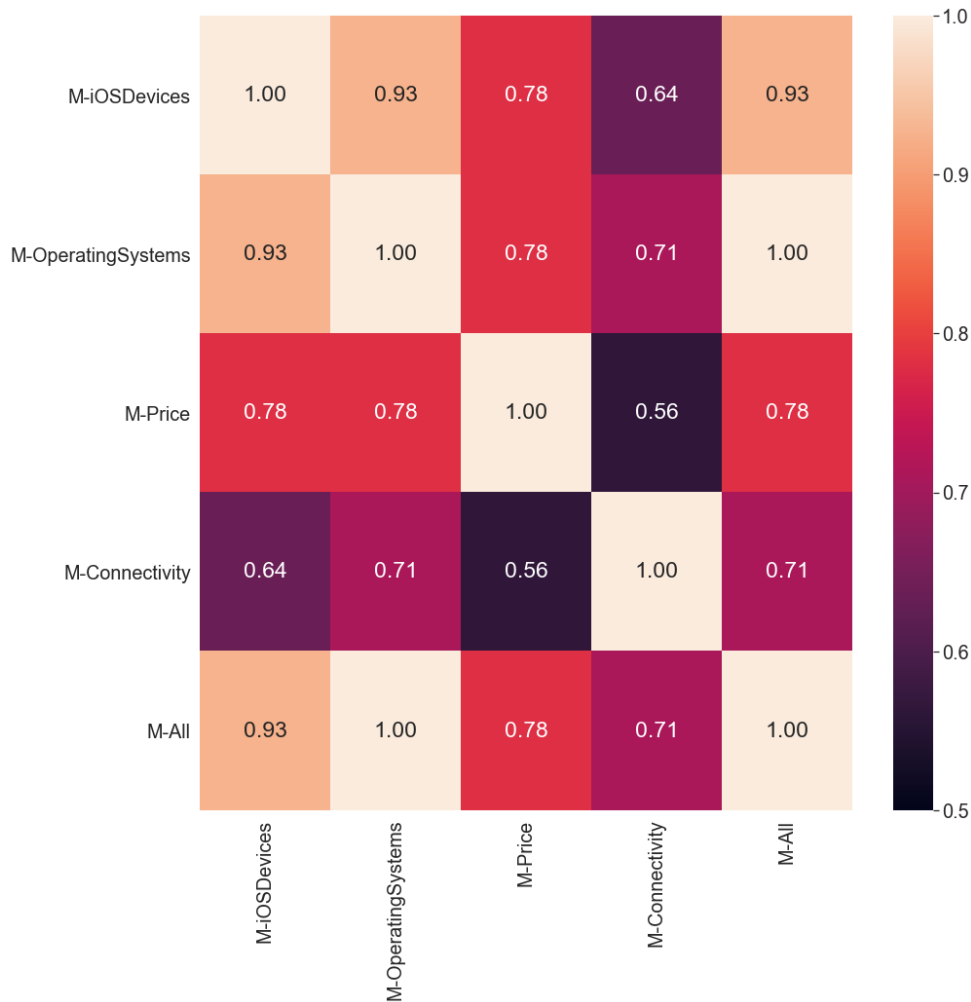

**Figure A.** Kendall's- $\tau$  correlation across 11 countries for the GDP estimation of the Venezuelans Migrants and Refugees among the different linear regression models. M-iOSDevices is the model trained using only the percentage of iOS devices among the target population; M-OperatingSystems, apart from the percentage of iOS devices, uses complementary percentage of Android and other devices (iOS, Android, Other); M-Price is a model created with the device category as described in Table E (Expensive, Mid-range, Cheap, Other); M-Connectivity is a model exploring the network connectivity used to access Facebook (3G, 4G, Wifi); M-All uses all variables above.

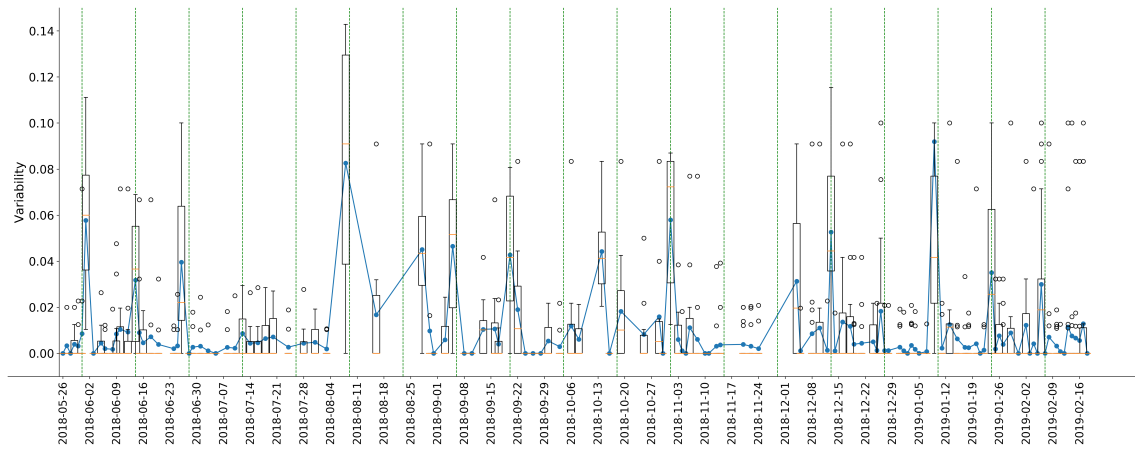

**Figure B. The variability between consecutive Facebook collection over time.** Each marker/boxplot represents how much variability was found between one collection and the preceding collection. We found a bi-weekly pattern, represented by the equally spaced vertical green lines, indicating when Facebook potentially refreshes their system.

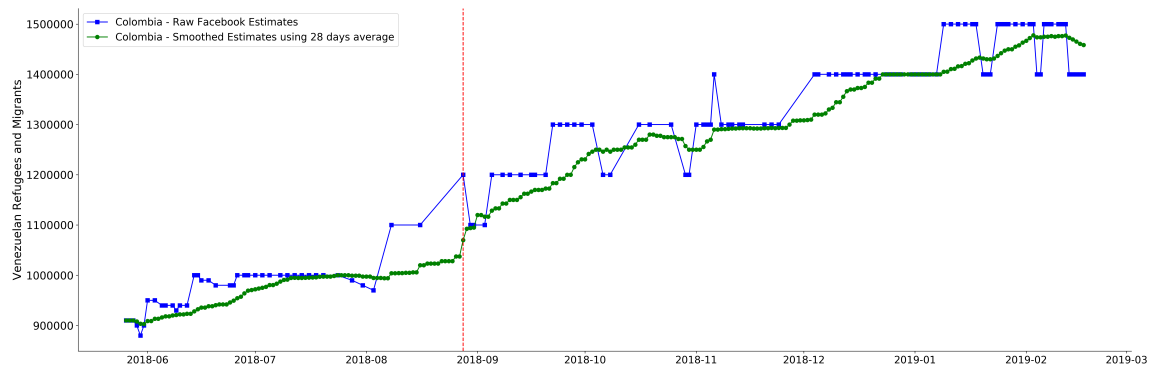

**Figure C. Comparison between raw single-point Facebook estimates and smoothed estimates for Venezuelans refugees and migrants in Colombia.** In the 268-day period of our study, 131 data collections were conducted. We show the raw single-point Facebook estimates (blue) and compare them to a smoothed version that averages over all collections made in the prior 28 days (green). The biggest gap between the raw estimates and the smoothed ones is shown by the red dashed vertical line.

**Table A.** Comparison between the estimates of refugees and migrants from Venezuela in different countries used in Fig. 1 for Facebook and both the Refugee Response Plan (RRP) and the R4V Map and Geodata (R4V).

| Data Sources                                 | Location      | Facebook | Other<br>(RRP or R4V) | Difference<br>(FB - Other) | Rel. Diff.<br>(FB/Other) |
|----------------------------------------------|---------------|----------|-----------------------|----------------------------|--------------------------|
| Facebook data<br>collected on<br>Sep 3, 2018 | Colombia      | 1.1M     | 1.3M                  | -163.4k                    | .870                     |
|                                              | Peru          | 420.0k   | 506.2k                | -86.2k                     | .829                     |
|                                              | Chile         | 240.0k   | -                     | -                          | -                        |
|                                              | Ecuador       | 180.0k   | 221.0k                | -41.0k                     | .814                     |
|                                              | Argentina     | 120.0k   | -                     | -                          | -                        |
| RRP estimates<br>made in<br>Sep 2018         | Panama        | 80.0k    | -                     | -                          | -                        |
|                                              | Brazil        | 60.0k    | 85.0k                 | -25.0k                     | .705                     |
|                                              | Uruguay       | 9.1k     | -                     | -                          | -                        |
|                                              | Latin America | 2.3M     | 2.7M                  | -346.2k                    | .870                     |
| Facebook data<br>collected on<br>Nov 3, 2018 | Colombia      | 1.3M     | 1.0M                  | 300.0k                     | 1.300                    |
|                                              | Peru          | 520.0k   | 506.0k                | 14.0k                      | 1.028                    |
|                                              | Chile         | 260.0k   | 108.0k                | 152.0k                     | 2.407                    |
|                                              | Ecuador       | 220.0k   | 221.0k                | -1.0k                      | .995                     |
|                                              | Argentina     | 130.0k   | 130.0k                | 0.0                        | 1.000                    |
| R4V estimates<br>made in<br>Nov 2018         | Panama        | 81.0k    | 94.0k                 | -13.0k                     | .861                     |
|                                              | Brazil        | 73.0k    | 85.0k                 | -12.0k                     | .858                     |
|                                              | Uruguay       | 9.9k     | 8.5k                  | 1.4k                       | 1.165                    |
|                                              | Latin America | 2.8M     | 2.4M                  | 395.2k                     | 1.165                    |
| Facebook data<br>collected on<br>Dec 3, 2018 | Colombia      | 1.4M     | 1.5M                  | -129.0k                    | .915                     |
|                                              | Peru          | 560.0k   | 698.3k                | -138.3k                    | .801                     |
|                                              | Chile         | 280.0k   | -                     | -                          | -                        |
|                                              | Ecuador       | 230.0k   | 278.0k                | -48.0k                     | .827                     |
|                                              | Argentina     | 130.0k   | -                     | -                          | -                        |
| RRP estimates<br>made in<br>Dec 2018         | Panama        | 80.0k    | -                     | -                          | -                        |
|                                              | Brazil        | 75.0k    | 103.8k                | -28.8k                     | .722                     |
|                                              | Uruguay       | 10.0k    | -                     | -                          | -                        |
|                                              | Latin America | 3.0M     | 3.3M                  | -347.3k                    | .895                     |
| Facebook data<br>collected on<br>Feb 2 2019  | Colombia      | 1.5M     | 1.1M                  | 400.0k                     | 1.364                    |
|                                              | Peru          | 630.0k   | 506.0k                | 124.0k                     | 1.245                    |
|                                              | Chile         | 310.0k   | 288.0k                | 22.0k                      | 1.076                    |
|                                              | Ecuador       | 250.0k   | 221.0k                | 29.0k                      | 1.131                    |
|                                              | Argentina     | 140.0k   | 130.0k                | 10.0k                      | 1.077                    |
| R4V estimates<br>made in<br>Feb 2019         | Panama        | 80.0k    | 94.0k                 | -14.0k                     | .851                     |
|                                              | Brazil        | 83.0k    | 96.0k                 | -13.0k                     | .864                     |
|                                              | Uruguay       | 11.0k    | 8.5k                  | 2.5k                       | 1.294                    |
|                                              | Latin America | 3.2M     | 2.7M                  | 513.4k                     | 1.190                    |

**Table B. University graduate Facebook users.** “University Graduate FB Users in host location” and “University Graduate FB Users from Venezuela” are the number of self-declared university graduate Facebook users from, respectively, the host population in a location and the migrants from Venezuela living in the same location. “% University Graduate Users in host location” and “% University Graduate Users from Venezuelans” are the percentage of self-declared university graduate Facebook users from, respectively, the host population in a location and the migrants from Venezuela living in the same location.

| Location            | University Graduate<br>FB Users in host<br>location | University Graduate<br>FB Users from<br>Venezuela | % University<br>Graduate Users in<br>host location | % University<br>Graduate Users from<br>Venezuelans |
|---------------------|-----------------------------------------------------|---------------------------------------------------|----------------------------------------------------|----------------------------------------------------|
| Argentina           | 9.1M                                                | 77.0k                                             | 30.7                                               | 54.6                                               |
| Aruba               | 14.0k                                               | 3.3k                                              | 27.2                                               | 36.7                                               |
| Bolivia             | 1.6M                                                | 3.5k                                              | 24.6                                               | 44.9                                               |
| Brazil              | 35.0M                                               | 31.0k                                             | 27.6                                               | 37.8                                               |
| Chile               | 3.5M                                                | 170.0k                                            | 29.9                                               | 54.1                                               |
| Colombia            | 10.0M                                               | 530.0k                                            | 33.0                                               | 36.6                                               |
| Costa Rica          | 850.0k                                              | 8.2k                                              | 27.7                                               | 49.4                                               |
| Curacao             | 19.0k                                               | 3.4k                                              | 24.1                                               | 40.0                                               |
| Dominican Republic  | 1.7M                                                | 25.0k                                             | 31.8                                               | 48.1                                               |
| Ecuador             | 3.8M                                                | 110.0k                                            | 34.2                                               | 44.0                                               |
| Spain               | 6.1M                                                | 130.0k                                            | 32.1                                               | 50.2                                               |
| Guyana              | 91.0k                                               | 1.8k                                              | 24.3                                               | 31.6                                               |
| Mexico              | 23.0M                                               | 47.0k                                             | 27.7                                               | 45.6                                               |
| Panama              | 490.0k                                              | 38.0k                                             | 29.9                                               | 48.7                                               |
| Peru                | 7.0M                                                | 290.0k                                            | 30.8                                               | 45.3                                               |
| Trinidad and Tobago | 250.0k                                              | 5.0k                                              | 37.9                                               | 40.7                                               |
| United States       | 65.0M                                               | 210.0k                                            | 39.6                                               | 50.8                                               |
| Uruguay             | 800.0k                                              | 6.0k                                              | 33.6                                               | 53.6                                               |
| Venezuela           | 4.2M                                                | -                                                 | 35.9                                               | -                                                  |
| Roraima, Brazil     | 82.0k                                               | 13.0k                                             | 28.3                                               | 34.9                                               |
| São Paulo, Brazil   | 9.9M                                                | 4.0k                                              | 30.6                                               | 47.6                                               |
| Miraflores, Peru    | 180.0k                                              | 9.6k                                              | 51.7                                               | 52.5                                               |

**Table C.** Details of the linear model to estimate GDP based on iOS devices (M-iOSDevices).

| <b>Metric</b>      | <b>Value</b>  |
|--------------------|---------------|
| Model              | OLS           |
| Method             | Least Squares |
| No. Observations   | 15            |
| Df Residuals       | 13            |
| Df Model           | 1             |
| R-squared          | 0.883         |
| Adj. R-squared     | 0.874         |
| F-statistic        | 97.76         |
| Prob (F-statistic) | 2.05e-07      |
| Log-Likelihood     | -147.59       |
| AIC                | 299.2         |
| BIC                | 300.6         |
| Omnibus            | 0.615         |
| Prob(Omnibus)      | 0.735         |
| Skew               | 0.013         |
| Kurtosis:          | 2.034         |
| Durbin-Watson      | 1.961         |
| Jarque-Bera (JB):  | 0.583         |
| Prob(JB)           | 0.747         |
| Cond. No.          | 8.65          |

**Table D. Data used in the experiments to predict GDP per capita.** “UN GDP’17” is the ground-truth estimations used by the linear model. “%iOS host population” and “%iOS Venezuelans” are the percentage of users that accessed Facebook with an iOS device from, respectively, the host population in a location and the refugees and migrants from Venezuela living in the same location. “GDP per capita predicted to host population” and “GDP per capita predicted to Venezuelans” are the model GDP per capita predictions for both host population and Venezuelans in a location using the M-iOSDevices model.

| Location            | UN GDP’17 | %iOS host population | GDP per capita predicted to host population | %iOS Venezuelans | GDP per capita predicted to Venezuelans |
|---------------------|-----------|----------------------|---------------------------------------------|------------------|-----------------------------------------|
| Argentina           | 14.4k     | 5.9                  | 6.7k                                        | 15.3             | 16.6k                                   |
| Aruba               | 25.7k     | 31.5                 | 33.5k                                       | 18.8             | 20.2k                                   |
| Brazil              | 9.8k      | 9.8                  | 10.8k                                       | 4.6              | 5.4k                                    |
| Chile               | 15.3k     | 14.6                 | 15.9k                                       | 13.8             | 15.0k                                   |
| Colombia            | 6.3k      | 6.8                  | 7.6k                                        | 3.1              | 3.7k                                    |
| Curacao             | 19.6k     | 22.6                 | 24.2k                                       | 16.7             | 18.0k                                   |
| Dominican Republic  | 7.1k      | 12.7                 | 13.8k                                       | 17.5             | 18.9k                                   |
| Ecuador             | 6.3k      | 7.3                  | 8.2k                                        | 6.2              | 7.0k                                    |
| Spain               | 28.4k     | 22.2                 | 23.8k                                       | 28.5             | 30.4k                                   |
| Mexico              | 9.0k      | 11.6                 | 12.7k                                       | 23.2             | 24.9k                                   |
| Panama              | 15.1k     | 8.3                  | 9.2k                                        | 21.2             | 22.7k                                   |
| Peru                | 6.6k      | 4.3                  | 5.0k                                        | 4.2              | 5.0k                                    |
| Trinidad and Tobago | 16.1k     | 15.5                 | 16.8k                                       | 10.8             | 11.8k                                   |
| United States       | 60.1k     | 51.4                 | 54.4k                                       | 54.3             | 57.5k                                   |
| Uruguay             | 17.1k     | 13.0                 | 14.2k                                       | 15.8             | 17.1k                                   |
| Venezuela           | -         | 4.4                  | 5.1k                                        | -                | -                                       |
| São Paulo, Brazil   | -         | 12.6                 | 13.7k                                       | 14.8             | 16.0k                                   |
| Roraima, Brazil     | -         | 7.5                  | 8.4k                                        | 2.7              | 3.3k                                    |
| Miraflores, Peru    | -         | 16.7                 | 18.0k                                       | 9.9              | 10.9k                                   |

**Table E. Information regarding the mobile phone model used to access Facebook can also be used to target advertisements.** We manually crafted a list of the most popular devices in December 2018 and categorize them according to their average price found in the US Amazon in that period. If a device is not found in the list it is assigned to an “Other” category. Note that a list like this requires constant maintenance to keep it updated. Facebook ID is the unique Facebook Graph API ID of each device.

| Category   | Device Name          | Brand      | Global Number of FB Users | Facebook ID   | Average Top 3 Prices |
|------------|----------------------|------------|---------------------------|---------------|----------------------|
| Expensive  | iPhone X             | Apple      | 20,540,474                | 6092512462983 | \$991.33             |
|            | iPhone 8             | Apple      | 16,906,896                | 6092512412783 | \$808.96             |
|            | iPhone 8 Plus        | Apple      | 18,402,743                | 6092512424583 | \$769.52             |
|            | Galaxy Note 8        | Samsung    | 8,164,808                 | 6083036245383 | \$735.12             |
|            | Iphone 7 Plus        | Apple      | 31,111,816                | 6060616598183 | \$561.92             |
|            | Galaxy S8+           | Samsung    | 10,743,780                | 6075237226583 | \$544.31             |
|            | Iphone 7             | Apple      | 46,834,282                | 6060616578383 | \$531.99             |
|            | Galaxy S8            | Samsung    | 16,135,001                | 6075237200983 | \$511.66             |
| Mid-Range  | Galaxy S7 Edge       | Samsung    | 16,547,729                | 6043522870783 | \$408.83             |
|            | Iphone 6S Plus       | Apple      | 16,578,673                | 6031259590183 | \$344.99             |
|            | Ipad Mini 2          | Apple      | 5,913,214                 | 6011244510983 | \$300.31             |
|            | IPad Air 2           | Apple      | 8,951,253                 | 6018995113183 | \$289.61             |
|            | Galaxy S7            | Samsung    | 17,334,389                | 6043523344783 | \$282.73             |
|            | Iphone 6 plus        | Apple      | 13,859,355                | 6017831560783 | \$240.61             |
|            | Galaxy Note 3        | Samsung    | 6,087,733                 | 6013279353983 | \$236.62             |
|            | Galaxy Note 5        | Samsung    | 6,759,041                 | 6042330550783 | \$234.64             |
|            | Galaxy Note 4        | Samsung    | 4,642,541                 | 6019098214783 | \$232.74             |
|            | Ipad Air             | Apple      | 8,433,554                 | 6011244513583 | \$232.51             |
|            | Galaxy S6            | Samsung    | 20,689,461                | 6026660740983 | \$218.98             |
|            | Ipad 3               | Apple      | 3,770,684                 | 6004383806772 | \$204.62             |
| Iphone 6 S | Apple                | 42,229,679 | 6031259562783             | \$200.91      |                      |
| Cheap      | Iphone SE            | Apple      | 15,263,291                | 6054947014783 | \$179.99             |
|            | Galaxy Tab 4         | Samsung    | 5,951,716                 | 6016925404783 | \$179.80             |
|            | HTC One              | HTC        | 3,749,715                 | 6014809859183 | \$179.00             |
|            | Galaxy Tab 3         | Samsung    | 10,889,493                | 6016925643983 | \$169.00             |
|            | Ipad Mini 1          | Apple      | 7,028,853                 | 6011191259183 | \$159.00             |
|            | Iphone 6             | Apple      | 49,648,867                | 6017831572183 | \$156.33             |
|            | Galaxy S III Mini    | Samsung    | 3,666,046                 | 6013017211983 | \$155.31             |
|            | Galaxy S5            | Samsung    | 14,520,127                | 6014808618583 | \$154.50             |
|            | iPad 4               | Apple      | 6,035,561                 | 6011191254383 | \$152.31             |
|            | iPad 2               | Apple      | 5,478,260                 | 6004383808772 | \$139.98             |
|            | iPhone 5S            | Apple      | 27,684,686                | 6010095777183 | \$127.05             |
|            | iPhone 5             | Apple      | 9,745,370                 | 6004883585572 | \$125.64             |
|            | Galaxy S III devices | Samsung    | 6,272,092                 | 6007481031783 | \$116.33             |
|            | iPhone 5C            | Apple      | 3,927,621                 | 6010095794383 | \$109.83             |
|            | Galaxy S4            | Samsung    | 9,042,092                 | 6013016790183 | \$81.17              |
|            | Ipad 1               | Apple      | 2,686,644                 | 6004383767972 | \$71.80              |
|            | Galaxy Tab 2         | Samsung    | 2,485,025                 | 6016925657183 | \$40.20              |
| iPhone 4S  | Apple                | 5,253,565  | 6004386303972             | \$39.15       |                      |
